# Supplementary material for: Increased Circulating Levels of Neutrophil Extracellular Traps During Cardiopulmonary Bypass
Source: PubMed Central journal article supplement — CJC Open. 2019 Dec 16;2(2):39–48. doi: 10.1016/j.cjco.2019.12.001 (PMC7067687; doi:10.1016/j.cjco.2019.12.001), 2019-12-16
Supplement: mmc1.pdf [file mmc1.pdf]

## **Supplementary material**

### **Appendix 1: Description of the clinical characteristic of the outlier**

The outlier identified in the analysis of NETs measurements is a 72 years old man undergoing aortic valve replacement with an EuroScore of 1.00%. He had severe symptomatic aortic stenosis with an impairment of exercise tolerance (NYHA class III). He was not known to have other medical comorbidities. He had a normal left ventricular ejection fraction before surgery (55%). Before surgery, he had a total leukocyte count of 7.9, a neutrophil count of 5.9 and a lymphocyte count of 0.3. He underwent aortic valve replacement with a cardiopulmonary bypass duration of 52 minutes, an aortic cross clamping time of 39 minutes and an intra-operative fluid balance of 2.2L. Pre-operative interleukin-6 levels and CRP levels were 2.29 and 0.59, respectively. MPO, H3Cit and PTX3 levels before CBP were 457 (ng/mL), 0.51 (ng/mL) and 980 (pg/mL). He did not develop complications after surgery and was discharged from the ICU after 24 hours. He was discharged from the hospital 7 days after surgery.

**Table S1: Comparison between markers in healthy controls and cardiac surgery patients before initiation of cardiopulmonary bypass.**

| Marker               | Healthy controls          | Cardiac surgery:<br>Low risk | Cardiac surgery:<br>High risk | p-value            |
|----------------------|---------------------------|------------------------------|-------------------------------|--------------------|
| <b>IL-6 (pg/mL)</b>  | 1.26 (IQR: 1.17; 2.39)    | 2.30 (IQR: 1.78; 2.47)       | 5.38 (IQR: 3.82; 7.77)        | 0.004 <sup>a</sup> |
| <b>CRP (mg/L)</b>    | 0.66 (IQR: 0.97; 2.57)    | 1.58 (IQR: 0.97; 2.57)       | 1.86 (IQR: 0.86; 4.34)        | 0.012 <sup>b</sup> |
| <b>MPO (ng/mL)</b>   | 389.5 (IQR: 314.0; 513.0) | 356.1 (IQR: 245.2; 470.1)    | 375.2 (IQR: 204.5; 712.3)     | 0.82               |
| <b>H3Cit (ng/mL)</b> | 0.88 (IQR: 0.36; 1.36)    | 0.64 (IQR: 0.49; 0.95)       | 0.63 (IQR: 0.25; 2.26)        | 0.89               |
| <b>PTX3 (pg/mL)</b>  | 1033 (IQR: 749; 1448)     | 1040 (IQR: 669; 1287)        | 1022 (IQR: 501; 2479)         | 0.90               |

Legend: Results are presented in medians (interquartile range). Abbreviations: IL-6: Interleukin 6, CRP: C reactive protein, MPO: myeloperoxidase, H3Cit: Histone 3 Citrullinated, PTX3: Pentraxin related protein 3. P-value results from the comparison testing by the Kruskal-Wallis test. Multiple comparison testing for sub-group comparisons with Bonferroni correction: <sup>a</sup> Difference between Healthy controls and high risk is significant (p=0.001), <sup>b</sup> Difference between Healthy controls and high risk is significant (p=0.012).

**Table S2: Measurements of circulating interleukin 6 (IL-6; pg/mL)**

|                          | All patients (n=24)  | Low risk (n=12)      | High risk (n=12)     | p-value |
|--------------------------|----------------------|----------------------|----------------------|---------|
| <b>Before CPB</b>        | 3.05 (2.21; 6.02)    | 2.30 (1.78; 2.37)    | 5.38 (3.82; 7.77)    | 0.004   |
| <b>3 hours after CPB</b> | 249.4 (158.7; 587.2) | 221.1 (125.2; 344.7) | 333.8 (236.1; 681.1) | 0.20    |
| <b>Absolute change</b>   | 245.4 (153.4; 576.6) | 219.3 (123.0; 343.3) | 324.1 (233.5; 670.6) | 0.24    |
| <b>Fold-change</b>       | 90.1 (37.7; 196.6)   | 106.3 (41.7; 237.5)  | 62.4 (32.7; 165.1)   | 0.48    |

Legend: Results are presented in medians (interquartile range). Abbreviation: CPB: cardiopulmonary bypass. P-value results from the comparison testing by the Kruskal-Wallis test.

**Table S3: Measurements of C-reactive protein (CRP; mg/L)**

|                          | All patients (n=24) | Low risk (n=12)   | High risk (n=12)  | p-value |
|--------------------------|---------------------|-------------------|-------------------|---------|
| <b>Before CPB</b>        | 1.68 (0.91; 3.28)   | 1.58 (0.97; 2.57) | 1.86 (0.86; 4.34) | 0.67    |
| <b>3 hours after CPB</b> | 2.30 (1.26; 3.74)   | 2.34 (1.30; 2.49) | 2.24 (1.26; 5.56) | 0.67    |
| <b>Absolute change</b>   | 0.28 (0.04; 0.55)   | 0.16 (0.03; 0.44) | 0.41 (0.11; 0.66) | 0.20    |
| <b>Fold change</b>       | 1.15 (1.02; 1.52)   | 1.08 (1.02; 1.28) | 1.25 (1.03; 1.77) | 0.35    |

Legend: Results are presented in medians (interquartile range). Abbreviation: CPB: cardiopulmonary bypass. P-value results from the comparison testing by the Kruskal-Wallis test.

**Table S4: Measurements of Myeloperoxidase (MPO; ng/mL)**

|                          | All patients (n=24)  | Low risk (n=12)      | High risk (n=12)     | p-value |
|--------------------------|----------------------|----------------------|----------------------|---------|
| <b>Before CPB</b>        | 356.1 (228.1; 641.3) | 356.1 (245.2; 470.1) | 375.2 (204.5; 712.3) | 0.76    |
| <b>3 hours after CPB</b> | 582.9 (452.4; 752.5) | 597.9 (439.3; 668.1) | 555.7 (452.4; 850.9) | 0.71    |
| <b>Absolute change</b>   | 180.5 (18.4; 343.4)  | 179.4 (56.9; 422.9)  | 223.4 (46.8; 323.2)  | 0.80    |
| <b>Fold change</b>       | 1.47 (1.12; 2.64)    | 1.68 (1.12; 2.72)    | 1.43 (1.08; 2.44)    | 0.76    |

Legend: Results are presented in medians (interquartile range). Abbreviation: CPB: cardiopulmonary bypass. P-value results from the comparison testing by the Kruskal-Wallis test.

**Table S5: Measurements of citrullinated histone 3 (H3Cit; ng/mL)**

|                          | <b>All patients (n=24)</b> | <b>Low risk (n=12)</b> | <b>High risk (n=12)</b> | <b>p-value</b> |
|--------------------------|----------------------------|------------------------|-------------------------|----------------|
| <b>Before CPB</b>        | 0.64 (0.40; 1.15)          | 0.64 (0.49; 0.95)      | 0.63 (0.25; 2.26)       | 1.00           |
| <b>3 hours after CPB</b> | 1.91 (1.20; 2.96)          | 2.00 (1.33; 2.47)      | 1.71 (0.93; 3.75)       | 0.71           |
| <b>Absolute change</b>   | 0.87 (0.46; 1.62)          | 1.49 (0.23; 1.98)      | 0.75 (0.46; 1.36)       | 0.63           |
| <b>Fold change</b>       | 3.42 (1.45; 5.04)          | 3.76 (1.22; 5.04)      | 3.07 (1.63; 5.09)       | 0.89           |

Legend: Results are presented in medians (interquartile range). Abbreviation: CPB: cardiopulmonary bypass. P-value results from the comparison testing by the Kruskal-Wallis test.

**Table S6: Measurements of Pentraxin related protein 3 (PTX3; pg/mL)**

|                          | <b>All patients (n=24)</b> | <b>Low risk (n=12)</b> | <b>High risk (n=12)</b> | <b>p-value</b> |
|--------------------------|----------------------------|------------------------|-------------------------|----------------|
| <b>Before CPB</b>        | 1040 (593; 1349)           | 1041 (669; 1287)       | 1022 (501; 2479)        | 0.84           |
| <b>3 hours after CPB</b> | 2993 (1756; 3823)          | 2312 (1514; 3586)      | 3114 (2228; 4665)       | 0.32           |
| <b>Absolute change</b>   | 1876 (992; 2309)           | 1100 (953; 2286)       | 2189 (1773; 2342)       | 0.16           |
| <b>Fold change</b>       | 2.66 (1.93; 5.01)          | 2.27 (1.78; 6.07)      | 2.87 (2.12; 5.01)       | 0.51           |

Legend: Results are presented in medians (interquartile range). Abbreviation: CPB: cardiopulmonary bypass. P-value results from the comparison testing by the Kruskal-Wallis test.

**Table S7: Correlations between circulating NETs measurements and other inflammatory biomarkers during the study**

| <b>Timepoint</b>                                      | <b>Biomarker</b> | <b>Spearman correlation coefficient (r)</b> | <b>p-value</b> |
|-------------------------------------------------------|------------------|---------------------------------------------|----------------|
| <b>NETs measurements before CPB</b>                   | IL-6             | 0.02                                        | 0.93           |
|                                                       | CRP              | -0.06                                       | 0.79           |
|                                                       | MPO              | 0.44                                        | 0.03           |
|                                                       | H3Cit            | 0.20                                        | 0.36           |
|                                                       | PTX3             | 0.00                                        | 0.99           |
| <b>NETs measurements 3 hours after CPB separation</b> | IL-6             | -0.04                                       | 0.86           |
|                                                       | CRP              | 0.08                                        | 0.71           |
|                                                       | MPO              | 0.62                                        | 0.001          |
|                                                       | H3Cit            | 0.52                                        | 0.01           |
|                                                       | PTX3             | 0.25                                        | 24             |
| <b>Δ NETs measurements</b>                            | IL-6             | 0.00                                        | 1.00           |
|                                                       | CRP              | -0.19                                       | 0.37           |
|                                                       | MPO              | 0.58                                        | 0.003          |
|                                                       | H3Cit            | 0.67                                        | <0.001         |
|                                                       | PTX3             | 0.31                                        | 0.15           |

Abbreviations: CBP: cardiopulmonary bypass, CRP: C-related protein, H3Cit: Histone 3 Citrullinated, IL-6: Interleukin-6, MPO: myeloperoxidase, NETs: Neutrophil extracellular traps, PTX3: Pentraxin-related protein 3.

**Table S8: Change in circulating NETs measurements and complications in the post-operative period**

|                                                           | <b>No complication</b> | <b>Complication</b>  | <b>p-value</b> |
|-----------------------------------------------------------|------------------------|----------------------|----------------|
| <b>Acute kidney injury</b>                                | 0.041 (0.010; 0.069)   | 0.023 (0.018; 0.038) | 0.26           |
| <b>Difficult CPB separation</b>                           | 0.027 (-0.003; 0.038)  | 0.045 (0.038; 0.132) | 0.20           |
| <b>Right ventricular dysfunction after CPB separation</b> | 0.032 (-0.016; 0.046)  | 0.021 (0.010; 0.038) | 0.60           |

Abbreviations: CPB: cardiopulmonary bypass

**Table S9: Post-operative NETs measurements according to blood transfusion during surgery.**

|                                                      | <b>No blood transfusions<br/>(n=18)</b> | <b>≥ 1 blood<br/>transfusions (n=6)</b> | <b>p-value</b> |
|------------------------------------------------------|-----------------------------------------|-----------------------------------------|----------------|
| <b>NETs measurements 3 hours after CPB</b>           | 0.090 (0.064; 0.157)                    | 0.077 (0.067; 0.093)                    | 0.68           |
| <b>Difference in NETs measurements from baseline</b> | 0.032 (0.014; 0.071)                    | 0.041 (0.031; 0.045)                    | 0.85           |

Abbreviation: CPB: cardiopulmonary bypass
